# Supplementary material
Source: PubMed Central journal article supplement (PMC8038320)
Supplement: NIHMS1678143-supplement-Suppl_1B.pdf [file NIHMS1678143-supplement-Suppl_1B.pdf]

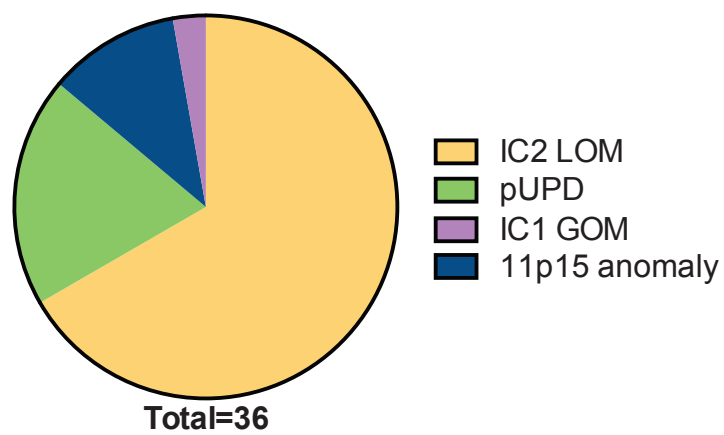

Figure, Supplemental Digital Content 1B. Characteristic data for entire cohort of tongue reduction patients with Beckwith-Wiedemann syndrome at a single institution from 2014-2019. B) Pie chart demonstrating the relative prevalence of Beckwith-Wiedemann syndrome molecular diagnoses for patients in the cohort.
