# Supplementary material
Source: PubMed Central journal article supplement (PMC8038320)
Supplement: NIHMS1678143-supplement-Suppl_2.pdf [file NIHMS1678143-supplement-Suppl_2.pdf]

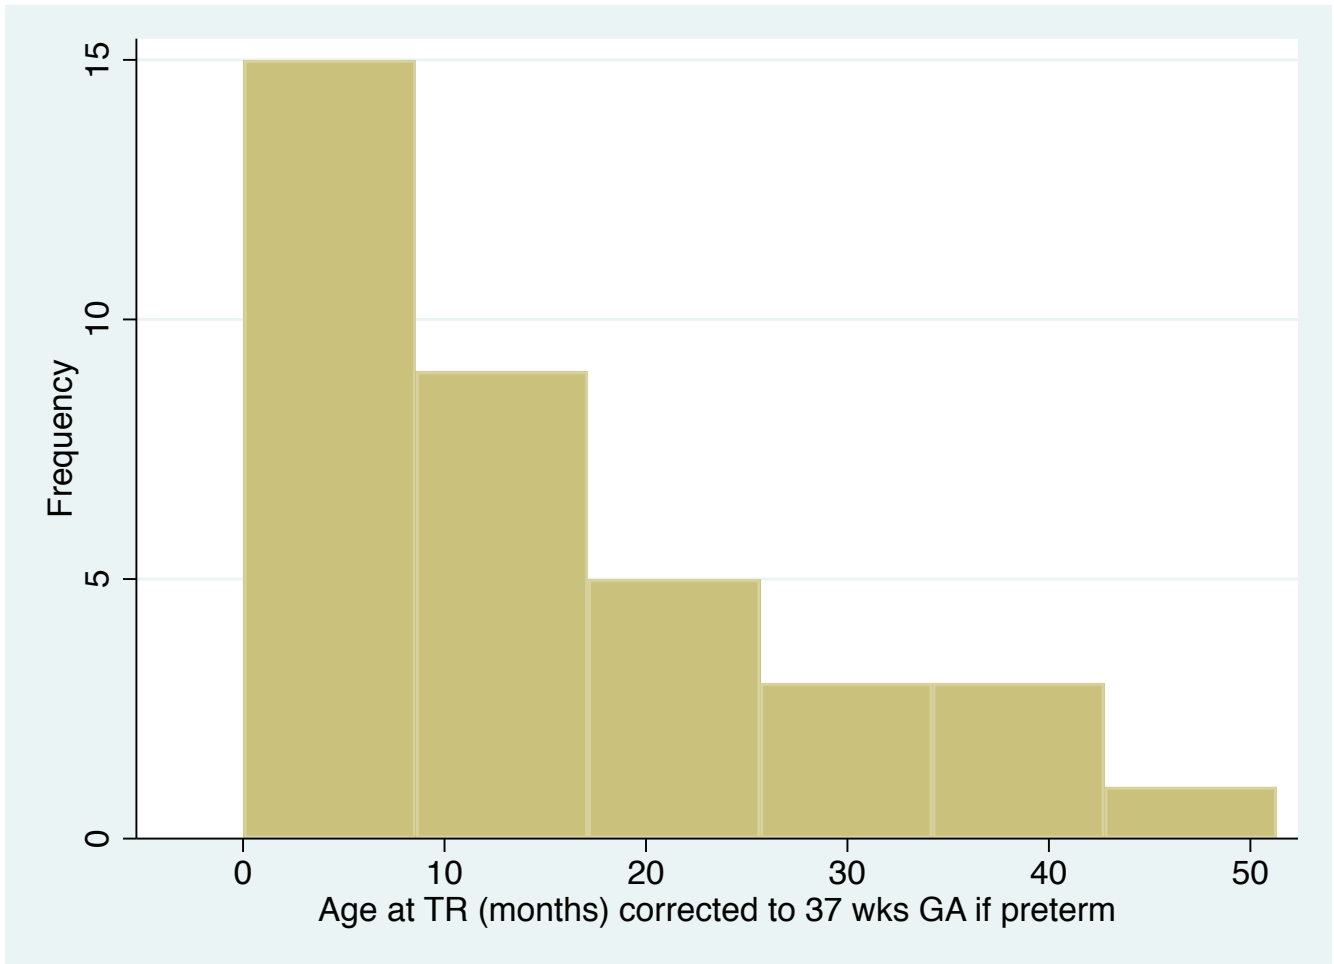

Figure, Supplemental Digital Content 2. Age at tongue reduction for patients who underwent surgery by a single surgeon, at a single institution, at the physician-recommended time. Histogram demonstrating the age at tongue reduction (months) corrected to 37-weeks gestation if premature <37 weeks. (n=36, mean=14.3 months±13.5 months)
