# Supplementary material
Source: PubMed Central journal article supplement (PMC8038320)
Supplement: NIHMS1678143-supplement-Suppl_3.pdf [file NIHMS1678143-supplement-Suppl_3.pdf]

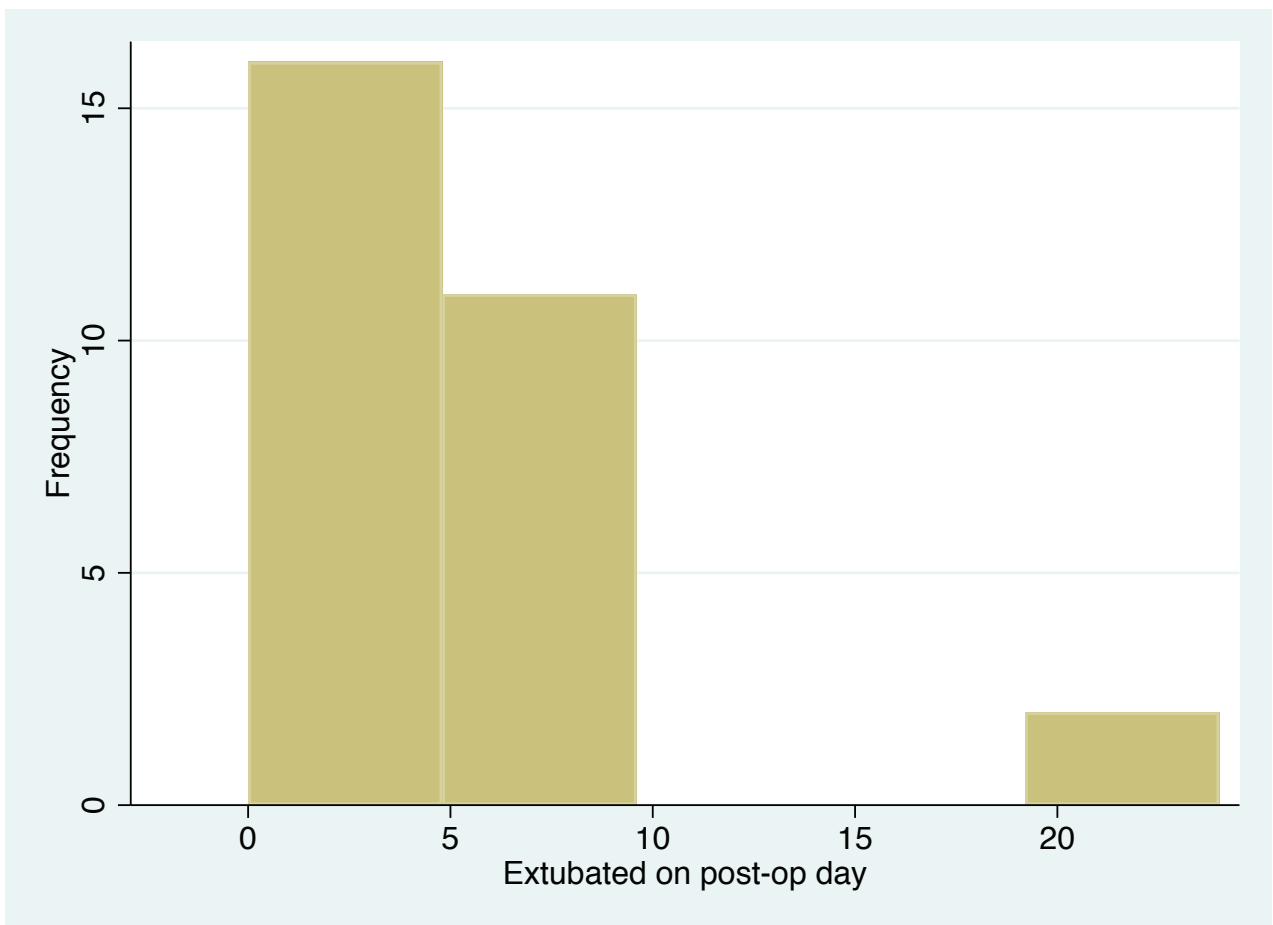

Figure, Supplemental Digital Content 3. Histogram demonstrating when extubation occurred following tongue reduction surgery for those patients who were not pre-operatively tracheostomy-dependent. (n=29, mean=5 days $\pm$ 5 days)
