# Supplementary material
Source: PubMed Central journal article supplement (PMC8038320)
Supplement: NIHMS1678143-supplement-Suppl__1A.pdf [file NIHMS1678143-supplement-Suppl__1A.pdf]

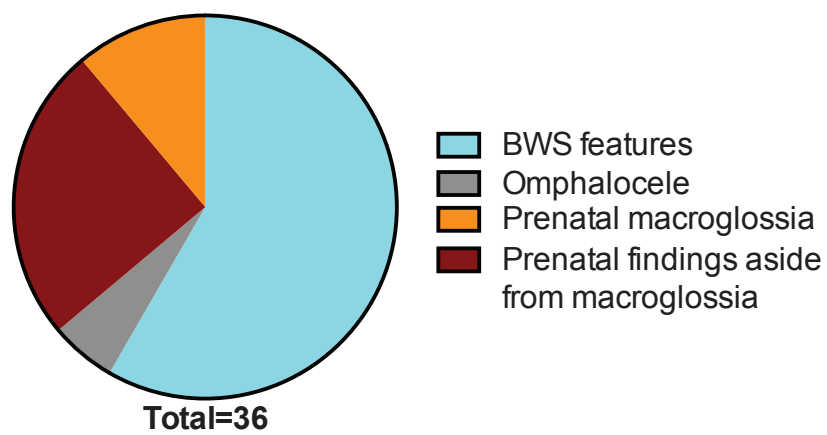

Figure, Supplemental Digital Content 1A. Characteristic data for entire cohort of tongue reduction patients with Beckwith-Wiedemann syndrome at a single institution from 2014-2019. A) Pie chart demonstrating the initial reason for genetics and plastic surgery consultations
